# 1 **2,4-Diaminothieno[3,2-*d*]pyrimidines, a new class of anthelmintic** 2 **with activity against adult and egg stages of whipworm**

3 **Short title: Diaminothienopyrimidines, a new chemotype for the control of**  
4 **whipworm**

## 5 **Author List**

6 Frederick A. Partridge<sup>1¶</sup>, Ruth Forman<sup>2¶</sup>, Nicky J. Willis<sup>3¶</sup>, Carole J.R. Bataille<sup>3¶</sup>, Emma A. Murphy<sup>2</sup>,  
7 <sup>#a</sup>, Anwen E. Brown<sup>1</sup>, Narinder Heyer-Chauhan<sup>1</sup>, Bruno Marinič<sup>3</sup>, Daniel J.C. Sowood<sup>3</sup>, Graham M.  
8 Wynne<sup>3</sup>, Kathryn J. Else<sup>2\*</sup>, Angela J. Russell<sup>3,4\*</sup> and David B. Sattelle<sup>1\*</sup>

9 <sup>1</sup> Centre for Respiratory Biology, UCL Respiratory, Division of Medicine, University College  
10 London, London, United Kingdom

11 <sup>2</sup> Faculty of Biology, Medicine and Health, University of Manchester, Manchester, United Kingdom

12 <sup>3</sup> Department of Chemistry, Chemistry Research Laboratory, University of Oxford, Oxford, United  
13 Kingdom

14 <sup>4</sup> Department of Pharmacology, University of Oxford, Oxford, United Kingdom

15 <sup>#a</sup> Current address: Liverpool School of Tropical Medicine, Liverpool, United Kingdom

16 \* Corresponding authors:

17 Email: [d.sattelle@ucl.ac.uk](mailto:d.sattelle@ucl.ac.uk) (DBS), [kathryn.else@manchester.ac.uk](mailto:kathryn.else@manchester.ac.uk) (KJE),  
18 [angela.russell@chem.ox.ac.uk](mailto:angela.russell@chem.ox.ac.uk) (AJR)

19 <sup>¶</sup> These authors contributed equally.

20

## 21 **Abstract**

22 The human whipworm *Trichuris trichiura* is a parasite that infects around 500 million people  
 23 globally, with consequences including damage to physical growth and educational performance.  
 24 Current drugs such as mebendazole have a notable lack of efficacy against whipworm, compared to  
 25 other soil-transmitted helminths. Mass drug administration programs are therefore unlikely to achieve  
 26 eradication and new treatments for trichuriasis are desperately needed. All current drug control  
 27 strategies focus on post-infection eradication, targeting the parasite *in vivo*. Here we propose  
 28 developing novel anthelmintics which target the egg stage of the parasite in the soil as an adjunct  
 29 environmental strategy. As evidence in support of such an approach we describe the actions of a new  
 30 class of anthelmintic compounds, the 2,4-diaminothieno[3,2-*d*]pyrimidines (DATPs). This compound  
 31 class has found broad utility in medicinal chemistry, but has not previously been described as having  
 32 anthelmintic activity. Importantly, these compounds show efficacy against not only the adult parasite,  
 33 but also both the embryonated and unembryonated egg stages and thereby may enable a break in the  
 34 parasite lifecycle.

## 35 **Author Summary**

36 The human whipworm, *Trichuris trichiura*, infects around 500 million people globally, impacting on  
 37 their physical growth and educational performance. There are currently huge mass drug  
 38 administration (MDA) programs aiming to control whipworm, along with the other major soil  
 39 transmitted helminths, *Ascaris* and hookworm. However single doses of albendazole and  
 40 mebendazole, which are used in MDA, have particularly poor effectiveness against whipworm, with  
 41 cure rates less than 40%. This means that MDA may not be able to control and eliminate whipworm  
 42 infection, and risks the spread of resistance to albendazole and mebendazole in the parasite  
 43 population.

44 We are attempting to develop new treatments for parasitic worm infection, particularly focused on  
 45 whipworm. Herein we report the identification of a class of compounds, diaminothienopyrimidines  
 46 (DATPs), which have not previously been described as anthelmintics. These compounds are effective  
 47 against adult stages of whipworm, and also block the development of the model nematode *C. elegans*.

48 Our DATP compounds reduce the ability of treated eggs to successfully establish infection in a mouse  
 49 model of human whipworm. These results support a potential environmental spray to control  
 50 whipworm by targeting the infectious egg stage in environmental hotspots.

## 51 Introduction

### 52 Current anthelmintics

53 The benzimidazole anthelmintics albendazole and mebendazole are typically used to treat human  
 54 whipworm infection but are compromised by lack of single-dose efficacy and the risk of resistance.  
 55 Thus, existing drugs lack sufficient efficacy in mass drug administration (MDA) programs to  
 56 adequately control or potentially eradicate whipworm. This is a major stumbling block in the WHO  
 57 target to eliminate morbidity from soil transmitted helminthiases in children by 2020. The current  
 58 approach for controlling soil-transmitted helminths such as *Trichuris* is mass drug administration of a  
 59 single-dose of albendazole or mebendazole, typically repeated annually [1]. However for infection  
 60 with *T. trichiura*, single doses of benzimidazoles lead to low cure rates, only 28% and 36% for  
 61 albendazole and mebendazole respectively [2]. These cure rates are much lower than those of other  
 62 major human soil-transmitted helminths, *Ascaris lumbricoides* and hookworm, demonstrating the  
 63 need for improvements to therapy specifically targeting *Trichuris*. Indeed modelling studies have  
 64 demonstrated that, due to these low cure rates, MDA with benzimidazoles does not interrupt  
 65 whipworm transmission and thus cannot achieve eradication in many settings [3].

66 Furthermore, the experience from studies on veterinary parasites is that widespread usage of  
 67 anthelmintics can lead to rapid development of resistance. The discovery of isolates of two species of  
 68 gastrointestinal nematodes resistant to monepantel only four years after its introduction [4] underlies  
 69 the real threat imposed by emerging drug resistance to control programmes. Indeed, the combination  
 70 of MDA programs and low single-dose cure rates may facilitate the development of drug resistance in  
 71 populations of human parasites. For example, resistance to benzimidazole drugs is caused by point  
 72 mutations in  $\beta$ -tubulin. Such resistance mutations have been found in *T. trichiura* after mass drug  
 73 administration [5], and have been found to increase in frequency after MDA. High frequency of  
 74 resistance mutations in a population may be associated with lower egg-reduction rates after MDA [6].  
 75 Whilst there is no clear evidence yet of widespread anthelmintic resistance in human populations,

76 identification of new drugs with novel mechanisms of actions is warranted to slow the development of  
77 drug resistance.

## 78 *Trichuris* lifecycle

79 A *T. trichiura* infection becomes patent when adult female worms, embedded in the gut of the host,  
80 start to lay eggs. A single female worm can lay up to 20,000 eggs per day and these unembryonated  
81 eggs pass out with the faeces and embryonate in the soil. Development only proceeds further if the  
82 embryonated eggs are accidentally consumed via contact of the next host with contaminated food,  
83 water or soil. Once ingested, signals for hatching are received when the eggs reach the large intestine  
84 [7,8], the newly emerged first stage larvae invade the mucosal epithelium and development to the  
85 adult stage of the parasite occurs through a succession of larval moults. Importantly, even when active  
86 infections are successfully treated, hosts are constantly re-infected due to high levels of infective eggs  
87 present within the water and soil, which can remain viable for years.

88 Current anthelmintic programmes, including those targeting *Trichuris*, focus on post-infection  
89 eradication of existing infections. However, lifecycle stages outside of the host are also potential  
90 viable targets for small molecule drugs. Thus, both preventing egg embryonation and reducing the  
91 infectivity of embryonated eggs prior to ingestion offer targets that would break the parasite lifecycle.

## 92 Screening *ex vivo* *T. muris* adults for new anthelmintic chemotypes

93 The mouse whipworm, *T. muris*, is a convenient model of the human whipworm as it can be grown  
94 routinely in the laboratory via infection of severe combined immune deficiency (SCID) mice.  
95 Screening *ex vivo* adult *T. muris* has been used to test the anthelmintic activity of a variety of  
96 compounds, including approved drugs with the potential for repurposing, and also plant extracts [9–  
97 11]. We recently reported a small molecule screen utilising an automated assay for assessment of the  
98 motility of *ex vivo* *T. muris* adults. This screen led to the identification of a class of molecules termed  
99 dihydrobenzoxazepinone (DHB) which demonstrated encouraging activity in this assay, as well as the  
100 ability to reduce *in vivo* infectivity of treated eggs [12]. Most of the active molecules identified from

101 that screen belonged to the dihydrobenz[*e*][1,4]oxazepin-2(3*H*)-one chemotype, but interestingly one  
 102 additional active was from a completely different structural class. Here we report the identification,  
 103 synthesis and characterisation of this second chemotype, which has not previously been described as  
 104 having anthelmintic activity, the 2,4-diamino thieno[3,2-*d*]pyrimidines (henceforth called  
 105 diaminothienopyrimidines or DATPs).

# Materials and methods

## Ethics statement

All animal experiments were approved by the University of Manchester Animal Welfare and Ethical Review Board and performed under the regulation of the Home Office Scientific Procedures Act (1986) and the Home Office project licence 70/8127.

## *In vivo* culture of *Trichuris muris*

*T. muris* worms were cultured using severe combined immune deficiency (SCID) mice, at the Biological Services Facility at the University of Manchester. Male and female mice were infected with 200 infective embryonated *T. muris* eggs via oral gavage. Thirty-five days later, the mice were sacrificed. Adult *T. muris* were obtained from the intestine as previously described [12]. Worms were maintained in Roswell Park Memorial Institute (RPMI) 1640 media supplemented with penicillin (500 U/mL) and streptomycin (500 µg/mL) at approximately 37 °C and studied on the same day.

## *Ex vivo* *T. muris* adult maintenance for motility screen

Individual adult worms were added to wells containing 75 µL of RPMI-1640 medium, penicillin (500 U/mL), streptomycin (500 µg/mL) plus 1% v/v final concentration of dimethylsulfoxide (DMSO) or compound dissolved in DMSO. Plates were incubated at 37 °C, 5% CO<sub>2</sub>. Motility was determined after 24 hours.

## Automated motility assay

An automated system was used to quantify worm movement. An earlier version of this system has been previously described [13,14]. Two hundred frame movies of the whole plate were recorded at 10 frames per second and then motility determined by an algorithm based on thresholding pixel variance over time [15]. Dose-response curves were calculated with the four factor log-logistic model using the R package *drc* [16] or using GraphPad Prism.

## Chemical synthesis

Thin layer chromatography (TLC) was performed on aluminium sheets coated with 60 F<sub>254</sub> silica. All solvents are used anhydrous unless stated otherwise. NMR spectra were recorded on Bruker AV400 (400 MHz), Bruker AVII 500 (500 MHz) or AVIIIHD 600 (600 MHz) instruments in the deuterated solvent stated. All chemical shifts ( $\delta$ ) are quoted in ppm and coupling constants ( $J$ ), which are not averaged, in Hz. Residual signals from the solvents were used as an internal reference using the stated deuterated solvent. Infrared spectra were recorded on a Perkin-Elmer 1750 IR Fourier Transform spectrophotometer using thin films on a diamond ATR surface (thin film). Only the characteristic peaks are quoted. Melting points were determined using a Stanford Research Systems EZ-Melt. Low resolution mass spectra ( $m/z$ ) were recorded on an Agilent 6120 spectrometer and high resolution mass spectra (HRMS  $m/z$ ) on a Bruker microTOF mass analyzer using electrospray ionization (ESI). Compounds were synthesised from commercially available starting materials, and fully characterised by Infrared (IR) Spectroscopy, Mass Spectrometry (ESI-MS, HRMS-ESI) and Nuclear Magnetic Resonance (<sup>1</sup>H and <sup>13</sup>C NMR).

### **2-Chloro-N-(2-(chlorophenoxy)ethyl)thieno[3,2-*d*]pyrimidin-4-amine 2a**

To a 20 mL microwave vial containing 2,4-dichlorothieno[3,2-*d*]pyrimidine (1.50 g, 7.32 mmol, 1.0 equiv.) in 1,4-dioxane (15 mL) at RT was added 2-(2-chlorophenoxy)ethylamine (1.26 g, 7.32 mmol, 1.0 equiv.) and *N,N*-diisopropylethylamine (2.5 mL, 14.64 mmol, 2.0 equiv.) under an argon atmosphere. The vessel was sealed and the reaction heated at 80 °C for 3 h. The mixture was cooled to RT, concentrated *in vacuo* and the crude residue was purified by flash column chromatography (silica gel) to afford the title compound as an off-white solid (1.59 g, 64%).

mp = 118–119 °C;  $R_f$  = 0.2;  $\nu_{\max}$  (film)/cm<sup>-1</sup> = 3398m (NH), 3088w (CH), 2970w (CH), 1586s (arom.), 1539m (arom.), 1483m (arom.); <sup>1</sup>H NMR (500 MHz, CDCl<sub>3</sub>)  $\delta$  7.75 (1H, d,  $J$  = 5.4 Hz), 7.39 (1H, dd,  $J$  = 8.0, 1.6 Hz), 7.36 (1H, d,  $J$  = 5.4 Hz), 7.23 (1H, ddd,  $J$  = 8.3, 7.5, 1.6 Hz), 7.02 (1H, dd,  $J$  = 8.4, 1.4 Hz), 6.96 (1H, apparent td,  $J$  = 7.9, 1.3 Hz), 5.79 (1H, t,  $J$  = 5.4 Hz), 4.30 (2H, t,  $J$  = 5.0 Hz), 4.13 (2H, apparent q,  $J$  = 5.4 Hz); <sup>13</sup>C NMR (500 MHz, CDCl<sub>3</sub>)  $\delta$  161.4, 158.1, 157.6, 153.9, 132.6,



130.5, 128.1, 124.9, 123.5, 122.6, 114.7, 114.3, 68.1, 40.5; LRMS (ESI<sup>-</sup>) calculated for [C<sub>14</sub>H<sub>11</sub>ON<sub>3</sub><sup>35</sup>Cl<sub>2</sub><sup>32</sup>S-H]<sup>-</sup> = 338.0, found 337.9, [M-H]<sup>-</sup>, 100%, calculated for [C<sub>14</sub>H<sub>11</sub>ON<sub>3</sub><sup>35</sup>Cl<sup>37</sup>Cl<sup>32</sup>S-H]<sup>-</sup> = 340.0, found, 339.9 [M-H]<sup>-</sup>, 60%; HRMS (ESI<sup>+</sup>) calculated for [C<sub>14</sub>H<sub>11</sub>ON<sub>3</sub><sup>35</sup>Cl<sub>2</sub><sup>32</sup>S+H]<sup>+</sup> = 340.0073, found 340.0071, [M+H]<sup>+</sup>.

## 160 **2-Chloro-N-(2-phenoxyethyl)thieno[3,2-d]pyrimidin-4-amine (2b)**

161 To a 20 mL microwave vial containing 2,4-dichlorothieno[3,2-d]pyrimidine (1.0 g, 5.0 mmol, 1.0 equiv.) in 1,4-dioxane (10 mL) at RT was added 2-phenoxyethylamine (0.6 mL, 5.0 mmol, 1.0 eq.) and *N,N*-diisopropylethylamine (1.7 mL, 10.0 mmol, 2.0 equiv.) under an argon atmosphere. The vessel was sealed and the reaction heated at 80 °C for 3 h. The mixture was cooled to RT, concentrated *in vacuo* and the crude residue was purified by flash column chromatography (silica gel) to afford the title compound as an off-white solid (1.23 g, 80%).

167  
168 mp = 115.5–116.9 °C; R<sub>f</sub> = 0.5 (EtOAc: Petroleum; 1:4); v<sub>max</sub> (film)/cm<sup>-1</sup> = 3228w (NH), 3041w (CH), 2962w (CH), 1597s (arom.), 1581s (arom.), 1533m (arom.), 1511m (arom.), (arom.), 1496m (arom.), 1469m (arom.), 1434m (arom.); <sup>1</sup>H NMR (500 MHz, CDCl<sub>3</sub>) δ 7.72 (1H, d, *J* = 5.4 Hz), 7.34 (1H, d, *J* = 5.4 Hz), 7.32–7.28 (2H, m), 6.97 (1H, app t, *J* = 7.3 Hz), 6.96–6.92 (2H, m), 5.78 (1H, t, *J* = 4.8 Hz), 4.22 (2H, t, *J* = 5.1 Hz), 4.11–4.06 (2H, m); <sup>13</sup>C NMR (126 MHz, CDCl<sub>3</sub>) δ 161.4, 158.4, 158.1, 157.5, 132.6, 129.7, 124.8, 121.5, 114.6, 114.1, 66.2, 40.9; LRMS (ESI<sup>+</sup>) calculated for [C<sub>14</sub>H<sub>12</sub>ON<sub>3</sub><sup>35</sup>Cl<sub>2</sub><sup>32</sup>S+H]<sup>+</sup> = 306.0, found 306.0, [M+H]<sup>+</sup>, 100%, calculated for [C<sub>14</sub>H<sub>12</sub>ON<sub>3</sub><sup>35</sup>Cl<sup>37</sup>Cl<sup>32</sup>S+H]<sup>+</sup> = 308.0, found 308.0, [M+H]<sup>+</sup>, 40%, calculated for [C<sub>14</sub>H<sub>12</sub>ON<sub>3</sub><sup>35</sup>Cl<sub>2</sub><sup>32</sup>S+Na]<sup>+</sup> = 328.0, found 328.0, [M+H]<sup>+</sup>, 60%, calculated for [C<sub>14</sub>H<sub>12</sub>ON<sub>3</sub><sup>35</sup>Cl<sup>37</sup>Cl<sup>32</sup>S+Na]<sup>+</sup> = 330.0, found 330.0, [M+H]<sup>+</sup>, 20%; HRMS (ESI<sup>+</sup>) calculated for [C<sub>14</sub>H<sub>12</sub>ON<sub>3</sub><sup>35</sup>Cl<sub>2</sub><sup>32</sup>S+H]<sup>+</sup> = 306.0462, found 306.0462, [M+H]<sup>+</sup>.

169

## 180 **General Synthetic Procedure**

181 To a 10 mL microwave vial containing 2-chlorothieno[3,2-d]pyrimidine (1.0 equiv) in *i*PrOH (10 μL/mg chloride) at room temperature was added the requisite amine (10.0 equiv.) under an argon

atmosphere. The vessel was sealed and the mixture heated at 100°C for 16-24 h. The reaction was cooled to ambient temperature (RT), concentrated *in vacuo* and the crude residue was purified by flash column chromatography (silica gel).

***N2-Methyl-N4-(2-phenoxyethyl)thieno[3,2-d]pyrimidine-2,4-diamine (3a, OX02925)***

Following general procedure 1, the title compound was obtained from **2b** (600 mg, 1.96 mmol, 1.0 equiv.) and methylamine (2.0 M in THF, 9.8 mL, 19.6 mmol, 10.0 eq). Purification by flash column chromatography (MeOH:CH<sub>2</sub>Cl<sub>2</sub>; 1:49 v/v) followed by trituration with cold Et<sub>2</sub>O afforded the desired product as a pale yellow viscous oil (526 mg, 89%).

$R_f$  = 0.2 (MeOH:CH<sub>2</sub>Cl<sub>2</sub>; 1:49 v/v);  $\nu_{\max}$  (film)/cm<sup>-1</sup> = 3418w (NH), 3232w (NH), 3038w (CH), 2936w (CH), 1585s (arom.), 1532s (arom.), 1508s (arom.), 1460s (arom.), 1405m (arom.); <sup>1</sup>H NMR (500 MHz, CDCl<sub>3</sub>)  $\delta$  7.55 (1H, d,  $J$  = 5.4 Hz), 7.33-7.28 (2H, m), 7.15 (1H, d,  $J$  = 5.4 Hz), 7.00-6.96 (1H, m), 6.96-6.93 (2H, m), 5.16 (1H, brs), 4.83 (1H, brs), 4.21 (2H, t,  $J$  = 5.26 Hz), 4.02 (2H, m), 3.04 (3H, d,  $J$  = 5.04 Hz); <sup>13</sup>C NMR (126 MHz, CDCl<sub>3</sub>)  $\delta$  161.9, 161.8, 158.5, 157.4, 130.4, 129.6, 124.1, 121.2, 114.5, 106.5, 66.6, 40.2, 28.7; LRMS (ESI<sup>+</sup>) calculated for [C<sub>15</sub>H<sub>16</sub>ON<sub>4</sub><sup>32</sup>S+H]<sup>+</sup> = 301.1, found 301.1 [M+H]<sup>+</sup>, 100%; HRMS (ESI<sup>+</sup>) calculated for [C<sub>15</sub>H<sub>16</sub>ON<sub>4</sub>C<sup>32</sup>S+H]<sup>+</sup> = 301.1119, found 301.1118 [M+H]<sup>+</sup>.

***N4-(2-(2-Chlorophenoxy)ethyl)-N2-(2-methoxyethyl)thieno[3,2-d]pyrimidine-2,4-diamine (3b, OX02926)***

Following general procedure 1, the title compound was obtained from **2a** (600 mg, 1.76 mmol, 1.0 equiv.) and 2-methoxyethylamine (1.5 mL, 17.6 mmol, 10.0 eq). Purification by flash column chromatography (MeOH:CH<sub>2</sub>Cl<sub>2</sub>; 1:49 v/v) followed by trituration with cold Et<sub>2</sub>O afforded the desired product as an off-white solid (380 mg, 57%).

mp = 69–97 °C (Et<sub>2</sub>O);  $R_f$  = 0.1 (MeOH:CH<sub>2</sub>Cl<sub>2</sub>; 1:49 v/v);  $\nu_{\max}$  (film)/cm<sup>-1</sup> = 3424w (NH), 3304w (NH), 3076w (CH), 2949w (CH), 1606m (arom.), 1532s (arom.), 1476m (arom.), 1460m

(arom.), 1444m (arom.), 1412m (arom.); <sup>1</sup>H NMR (400 MHz, CDCl<sub>3</sub>) δ 7.56 (1H, d, *J* = 5.3 Hz), 7.39 (1H, dd, *J* = 7.9, 1.4 Hz), 7.23-7.21 (1H, m), 7.13 (1H, d, *J* = 5.3 Hz), 7.00-6.92 (2H, m), 5.29 (1H, s), 5.17 (1H, s) 4.27 (2H, t, *J* = 5.2 Hz), 4.05 (2H, apparent q, *J* = 5.4 Hz), 3.68-3.59 (4H, m), 3.40 (3H, s); <sup>13</sup>C NMR (151 MHz, CDCl<sub>3</sub>) δ 161.8, 161.1, 157.3, 154.0, 130.5, 130.3, 127.8, 124.0, 123.3, 122.1, 114.3, 106.8, 71.6, 68.2, 58.7, 41.4, 39.9; LRMS (ESI<sup>+</sup>) calculated for [C<sub>17</sub>H<sub>19</sub>O<sub>2</sub>N<sub>4</sub><sup>35</sup>Cl<sup>32</sup>S+H]<sup>+</sup> = 379.1, found 379.1, [M+H]<sup>+</sup>, 100%, calculated for [C<sub>17</sub>H<sub>19</sub>O<sub>2</sub>N<sub>4</sub><sup>35</sup>Cl<sup>32</sup>S+Na]<sup>+</sup> = 401.1, found 401.1, [M+Na]<sup>+</sup>, 10%; HRMS (ESI<sup>+</sup>) calculated for [C<sub>17</sub>H<sub>19</sub>O<sub>2</sub>N<sub>4</sub><sup>35</sup>Cl<sup>32</sup>S+H]<sup>+</sup> = [M+H]<sup>+</sup>, 379.0990, found 379.0991 [M+H]<sup>+</sup>.

***N4-(2-(2-chlorophenoxy)ethyl)-N2-(2-methoxybenzyl)thieno[3,2-d]pyrimidine-2,4-diamine***  
**(3c, OX03143)**

Following general procedure 1, the title compound was obtained from **2a** (240 mg, 0.70 mmol, 1.0 eq.) and 2-methoxybenzylamine (0.92 mL, 7.0 mmol, 10.0 eq.). Purification by flash column chromatography (MeOH:CH<sub>2</sub>Cl<sub>2</sub>; 3:37 v/v) afforded the desired product (189 mg, 61%) as a thick pale yellow oil.

R<sub>f</sub> = 0.4 (MeOH:CH<sub>2</sub>Cl<sub>2</sub>; 3:22 v/v); ν<sub>max</sub> (film)/cm<sup>-1</sup> = 3424w (NH), 3247w (NH), 2935w (CH), 1587m (arom.), 1553 (arom.), 1487 (arom.), 1461 (arom.); <sup>1</sup>H NMR (600 MHz, CDCl<sub>3</sub>) δ 7.54 (1H, d, *J* = 5.3 Hz), 7.38 (1H, dd, *J* = 8.1, 1.7 Hz), 7.36 (1H, s) 7.22 (1H, ddd, *J* = 9.5, 7.5, 1.6 Hz), 7.20 (1H, ddd, *J* = 8.2, 7.5, 1.6 Hz), 7.12 (1H, d, *J* = 5.3 Hz), 6.93 (1H, dt, *J* = 7.5, 1.5 Hz), 6.91 (1H, ddd, *J* = 8.1, 7.1, 1.1 Hz), 6.89 (2H, d, *J* = 7.9 Hz), 5.34 (1H, br), 5.29 (1H, t, *J* = 5.3 Hz), 4.68 (2H, d, *J* = 6.2 Hz) 4.20 (2H, t, *J* = 5.3 Hz), 4.04 (2H, apparent q, *J* = 5.3 Hz), 3.87 (3H, s); <sup>13</sup>C NMR (151 MHz, CDCl<sub>3</sub>) δ 161.9, 161.2, 157.6, 157.4, 154.1, 130.5, 130.3, 129.1, 128.1 (x2), 127.8, 123.9, 123.3, 122.1, 120.3, 114.3, 110.1, 106.6, 68.2, 55.3, 41.4, 40.0; LRMS (ESI<sup>+</sup>) calculated for [C<sub>22</sub>H<sub>21</sub>O<sub>2</sub>N<sub>4</sub><sup>35</sup>Cl<sup>32</sup>S+H]<sup>+</sup> = 441.1, found 441.2, [M+H]<sup>+</sup>, 100%; HRMS (ESI<sup>+</sup>) calculated for [C<sub>22</sub>H<sub>21</sub>O<sub>2</sub>N<sub>4</sub><sup>35</sup>Cl<sup>32</sup>S+H]<sup>+</sup> = 441.1147, found 441.1142 [M+H]<sup>+</sup>.

***N4-(2-(2-chlorophenoxy)ethyl)-N2-methylthieno[3,2-d]pyrimidine-2,4-diamine*** (**3d**, OX03147)

Following general procedure 1, the title compound was obtained from **2a** (237 mg, 0.70 mmol) and methylamine (2.0 M in THF) (3.5 mL, 7.0 mmol, 10 eq). Purification by flash column chromatography (MeOH:CH<sub>2</sub>Cl<sub>2</sub>; 1:19 v/v) afforded the desired product (218 mg, 93%) as a pale brown oil.

$R_f$  = 0.4 (MeOH:CH<sub>2</sub>Cl<sub>2</sub>; 1:19 v/v);  $\nu_{\max}$  (film)/cm<sup>-1</sup> = 3247w (NH), 2940w (CH), 1588m (arom.), 1552m (arom.), 1510m (arom.), 1484m (arom.), 1461m (arom.), 1446m (arom.), 1406 (arom.); <sup>1</sup>H NMR (600 MHz, CDCl<sub>3</sub>)  $\delta$  7.56 (1H, d,  $J$  = 5.3 Hz), 7.38 (1H, dd,  $J$  = 7.9, 1.7 Hz) 7.21 (1H, ddd,  $J$  = 8.2, 7.5, 1.7 Hz), 7.15 (1H, d,  $J$  = 5.3 Hz), 6.98 (1H, dd,  $J$  = 8.2, 1.5 Hz), 6.95 (1H, dd,  $J$  = 7.5, 1.5 Hz) 5.31 (1H, t,  $J$  = 5.5 Hz), 4.84 (1H, s) 4.27 (2H, t,  $J$  = 5.4 Hz), 4.06 (2H, apparent q,  $J$  = 5.5 Hz), 3.04 (3H, d,  $J$  = 5.0 Hz); <sup>13</sup>C NMR (151 MHz, CDCl<sub>3</sub>)  $\delta$  162.0, 161.9, 157.5, 154.2, 130.7, 130.5, 128.0, 124.2, 123.6, 122.3, 114.6, 106.9, 68.5, 40.1, 28.9; LRMS (ESI<sup>+</sup>) calculated for [C<sub>15</sub>H<sub>15</sub>ON<sub>4</sub><sup>35</sup>Cl<sup>32</sup>S+H]<sup>+</sup> = 335.1, found 335.0, [M+H]<sup>+</sup>, 100%, calculated for [C<sub>15</sub>H<sub>15</sub>ON<sub>4</sub><sup>37</sup>Cl<sup>32</sup>S+H]<sup>+</sup> = 337.1, found 337.0, [M+H]<sup>+</sup>, 30%, HRMS (ESI<sup>+</sup>) calculated for [C<sub>15</sub>H<sub>15</sub>ON<sub>4</sub><sup>35</sup>Cl<sup>32</sup>S+H]<sup>+</sup> = 335.0728, found 335.0725 [M+H]<sup>+</sup>, calculated for [C<sub>15</sub>H<sub>15</sub>ON<sub>4</sub><sup>37</sup>Cl<sup>32</sup>S+H]<sup>+</sup> = 337.0698, found 337.0695 [M+H]<sup>+</sup>.

### *C. elegans* growth assay

A mixed-stage *C. elegans* N2 population was obtained by liquid culture (20 °C) according to standard methods [17]. It was then bleached to obtain an egg population with 1.5 mL 4M NaOH, 2.4 mL NaOCl, 2.1 mL water, washed three times, and allowed to hatch in 50 mL S-basal buffer at 20 °C overnight to obtain a synchronised L1 population. For the growth assay, 49  $\mu$ L of S-complete buffer and 1  $\mu$ L of DMSO or DMSO plus compound were added to each well of 96-well plates. 50  $\mu$ L of a worm suspension (approximately 20 synchronised L1 worms, 1% w/v *E. coli* HB101 in S-complete buffer) were then added to each well. Plates were incubated at 20 °C before imaging 5 days later. Worm movement was stimulated by inserting and removing a 96-well PCR plate into/from the wells of the assay plate, and then whole plate 200 frame movies were recorded at 30 frames per second. Growth was quantified as a correlate of movement using the same automated system described earlier.

## Cytotoxicity testing

The mouse rectal epithelial cell line CMT-93 (LGC Promochem, Teddington, United Kingdom) was used for these studies. The WST-8 and neutral red cytotoxicity assays were performed as described [12]. Briefly, cells were cultured with test compounds, chlorpromazine positive control or DMSO alone (final compound concentrations of 0 to 100  $\mu$ M) for 72 hours. The WST-8 assay was then carried out using the Cell Counting Kit – 8 (Sigma Aldrich # 96992) with an incubation time of 2 hours. Following this assay, the medium was exchanged, and the ability of the cells to take up the dye neutral red (concentration 33  $\mu$ g/mL, incubation time 2 hours) was determined using a microplate reader (absorbance at 540 nm). Results were analysed using GraphPad Prism and fitted using a log-logistic model.

## *In vitro* and *in vivo* establishment of infection

100 infective embryonated eggs were incubated in deionised water with 1% v/v DMSO or test compounds at a final concentration of 100  $\mu$ M in 1% v/v DMSO for 14 days at room temperature in the dark. Eggs were then washed and resuspended in deionised water. For *in vitro* hatching assays 100 eggs were added to 1 mL of *E. coli* bacterial culture grown in LB broth overnight at 37 °C shaking at 200 rpm. Egg-bacterial cultures were incubated for 24 hours at 37 °C, 5% CO<sub>2</sub> and hatching determined following blinding by visual examination under a dissecting microscope. For *in vivo* hatching assays, 40 eggs were counted under a dissecting microscope and given to a SCID mouse in 200  $\mu$ L water. At day 15 post-infection mice were culled and the number of worms present in the caecae and colon enumerated in a blinded manner.

## Statistical analysis of *in vivo* establishment of infection data

The experiment was conducted in two ‘experimental batches’. For batch one there were 5 mice in each of the DMSO and **OX02926** groups. For batch two there were 9 mice in each of the DMSO and **OX02926** groups. The raw data (number of worms that established infection in each mouse) are shown separated by batch and treatment in the S1 Figure.

To analyse the data we used a two-way ANOVA (worm number ~ treatment \* batch). This showed a significant effect of treatment [ $F(1,24) = 8.520$ ,  $P = 0.00752$ ]. It also showed a significant effect of batch [ $F(1,24) = 10.956$ ,  $P = 0.00294$ ]. There was no significant interaction between treatment and batch [ $F(1,24) = 0.296$ ,  $P = 0.59153$ ]. The significant effect of batch reflected that in both DMSO- and **OX02926**-treated groups, the number of worms that established infection was generally lower in mouse batch 1 than in batch 2 (S1 Figure). Variation in control worm establishment is commonplace in *Trichuris* infections due to natural variation in egg infectivity from a standardised egg number, but was within expected ranges. We therefore took the approach of normalising each data point by dividing by the mean of the DMSO-treated group for that batch. This gave the % batch normalised infection establishment.

We used a two-way ANOVA (% batch normalised infection establishment ~ treatment \* batch) to analyse the data. There was a significant effect of treatment [ $F(1,24) = 9.569$ ,  $P = 0.00497$ ] but no effect of batch [ $F(1,24) = 0.083$ ,  $P = 0.77618$ ] or interaction [ $F(1,24) = 0.083$ ,  $P = 0.77618$ ]. We therefore conducted a post-hoc Tukey HSD test which showed that infection establishment in the OX02926-treated group was significantly different from the DMSO-treated control group ( $P = 0.0050$ ).

### Embryonation assay

One hundred unembryonated eggs were treated with a water, 1% v/v DMSO in water or test compounds at a final concentration of 100  $\mu$ M (unless stated) with a final concentration of 1% v/v DMSO for 56 days in the dark at 26 °C. Images were collected on an Olympus BX63 upright microscope using a 60x / 1.42 PlanApo N (Oil) objective and captured and white-balanced using an DP80 camera (Olympus) in monochrome mode through CellSens Dimension v1.16 (Olympus). Images were then processed and analysed using Fiji [18].

313    **Data availability**

314    Structures of resynthesized compounds have been deposited in the PubChem database with CID  
315    49790760, 49790669, 46948320 and 49778268 and SID 348479445, 348479446, 348479447 and  
316    348479448. Assay results for resynthesized compounds have been deposited in the PubChem database  
317    with assay ID 1259352 and 1259353.

318

## Results

### *Ex vivo T. muris* adult motility screen

We have recently described a small molecule screen for new anthelmintics, which used reduction or loss of motility of adult *ex vivo T. muris* as an endpoint for screening [12]. This screen was designed to identify compounds active on *Trichuris* as existing drugs are notably less efficacious against this nematode, and it is comparatively evolutionary distant to nematodes typically screened in anthelmintic-discovery efforts, such as *H. contortus*, *M. incognita* and *C. elegans*. From this primary screen, we found 13 members of the dihydrobenzoxazepinone chemotype, which had not previously been shown to have anthelmintic activity.

In this report we describe the identification of a second new anthelmintic chemotype from this screen.

A single 2,4-diaminothieno[3,2-*d*]pyrimidine (DATP) compound was found in the primary screen (Fig 1A). This has been given the identifier **OX02926**. We confirmed this activity in a secondary screen using the same source sample (DMSO solution containing 10 mM compound), and also tested a number of structurally-related compounds from our small molecule collection using the same assay (Fig 1C). This led to the identification of three further active molecules in this series **OX02925**, **OX03143** and **OX03147** (Fig 1D).



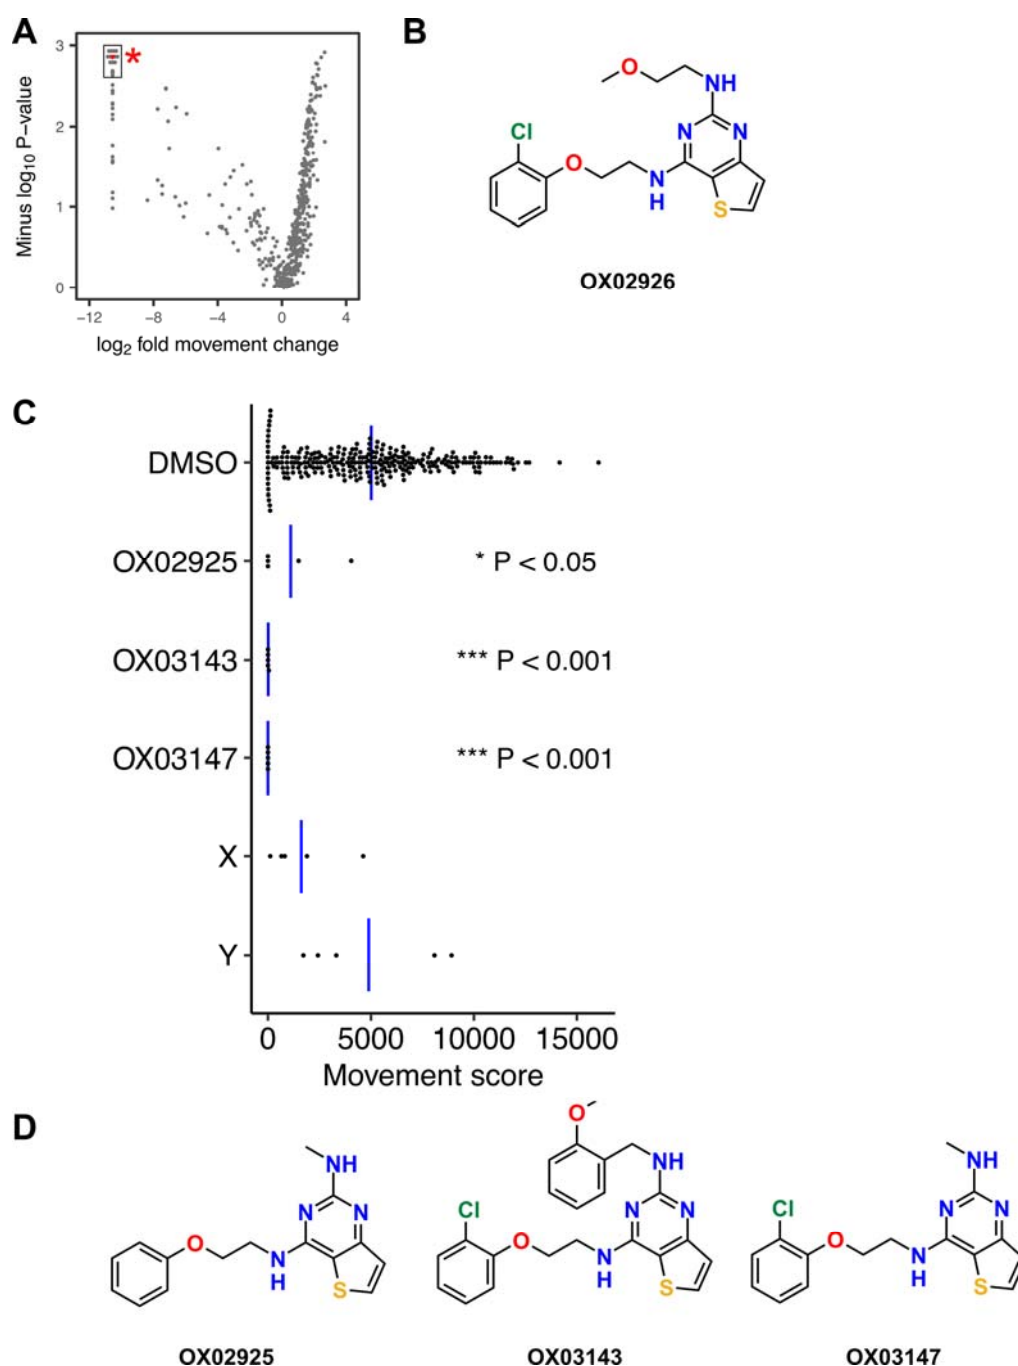

**Fig 1. Identification of a diaminothienopyrimidine series from an *ex vivo* *T. muris* motility screen.** (a) Volcano plot of the primary screen conducted as in [12], with the single DATP hit highlighted by a red asterisk. Movement change and P-value compared to DMSO-only controls. *n*=4. (b) Structure of the hit compound that was given the identifier **OX02926**. (c) Hit expansion by testing of structurally-related compounds using library material. Significance was determined by a two-sided

Mann-Whitney test compared to DMSO-only controls, adjusted for multiple comparisons using the Bonferroni method (for test compounds n=5, each replicate on different assay plates, each point indicates one assay well). Blue bar indicates mean movement score. Compounds X (Pubchem CID: 49790326) and Y (Pubchem CID: 49795120) were not significantly active in this assay. (d) Structures and identifiers of additional active compounds from this class.

#### Resynthesis of active compounds

Having identified promising active DATPs from testing of DMSO solution samples of compounds, these were then resynthesised to obtain authentic, unambiguously characterised samples from which confirmatory screening could take place. Compound resynthesis is important since DMSO solution samples can degrade over time, and this often leads to so-called ‘false positive’ hits [19]. These compounds could be readily prepared in two steps from commercially available 2,4-dichlorothieno[3,2-*d*]pyrimidine **1**, via two sequential nucleophilic aromatic substitution reactions. Treatment of **1** with 2-(2-chlorophenoxy)ethylamine or 2-phenoxyethylamine gave exclusively monosubstitution affording **2a** and **2b** as a single regioisomer in 64% and 80% yield respectively. Subsequent displacement reaction at C4 gave authentic samples of **OX02925**, **OX02926**, **OX03143** and **OX03147** in 57 – 91% yield (Fig 2).

358

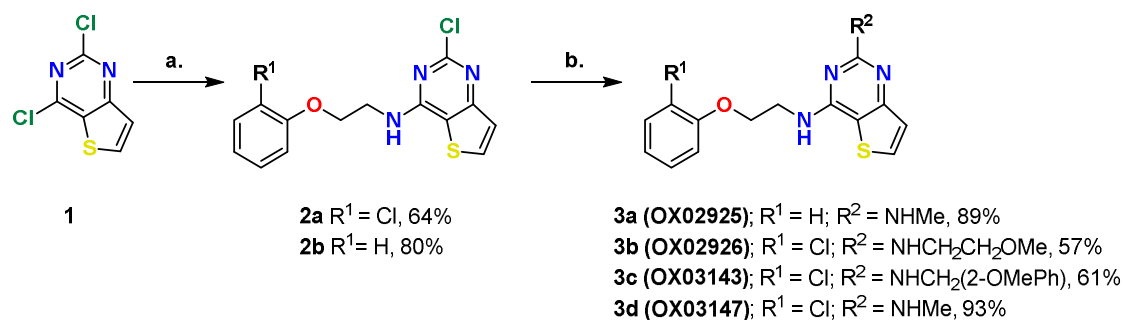

359

360 **Fig 2. Synthetic route to putative hit compounds** (a) Substituted 2-phenoxyethan-1-amine  
 361 (1.0 equiv.), DIPEA (2.0 equiv.), 1,4-dioxane, 80 °C, 3 h. (b) Alkyl amine (10.0 equiv.), *i*PrOH,  
 362 100 °C, 16-24 h.

363 Activity of resynthesised diaminothienopyrimidines in the *T. muris* *ex vivo* adult motility assay  
 364 The resynthesized hits were then tested in this screen and a concentration-response curve constructed,  
 365 thereby confirming the anthelmintic activity of several examples of this structural class. (Fig 3,  
 366 Table 1).

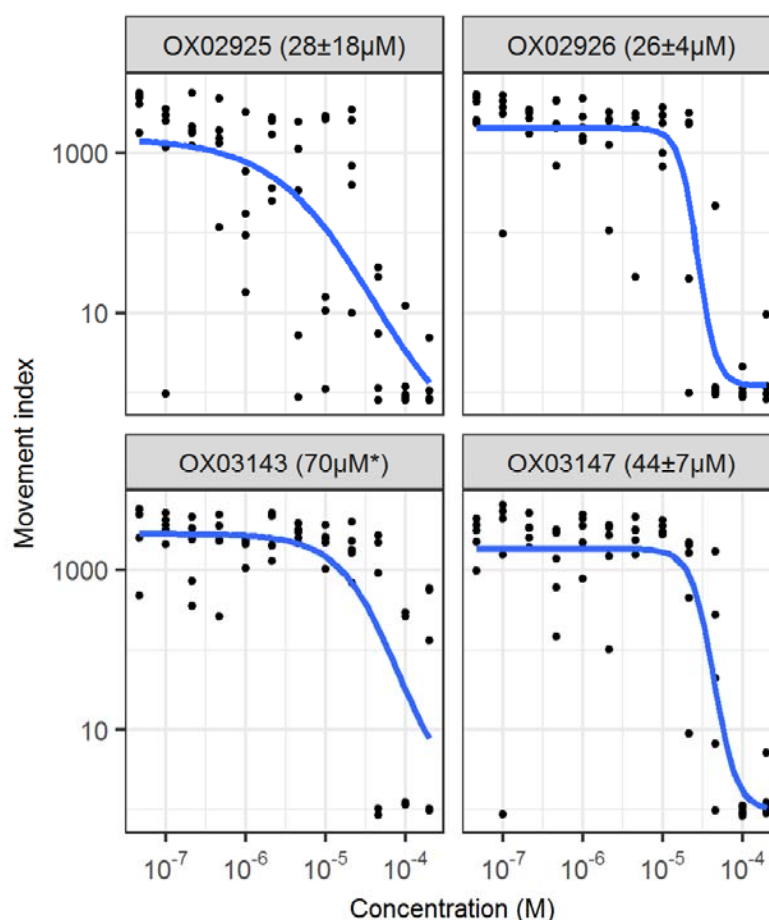

**Fig 3. Concentration-response curves for resynthesized DATPs in the *T. muris* ex vivo adult motility assay.** n=5 wells per concentration per compound, each replicate on a different 96-well plate, conducted on two experimental sessions using worms from different mice. Blue line indicates concentration-response curve fitted with the 4-factor log-logistic model using *drc* [16]. Figure in parenthesis indicates EC<sub>50</sub> estimate ± standard error from this model. No confidence limit could be calculated for **OX03143**.

Chemical properties of the hit series and synthetic suitability for further development

This class has ‘lead-like’ or ‘drug-like’ chemical properties [20], although it is important to note that in the contemporary medicinal chemistry literature this term is usually applied in the context of

imparting oral bioavailability characteristics (Table 1.). For agents targeting the gastrointestinal located *Trichuris*, minimal systemic exposure of the host is desirable and therefore it is critical to differentiate between the conventionally used terminology and parameters for ‘drug-like’ molecules, which affect solubility and permeability, and properties that would be relevant to agents targeting other body compartments. Recent literature has described this important caveat for non-peripheral CNS drugs [21], and indeed for anti-parasitic drug development [22]. Importantly, there is considerable scope for generating the large number of structural variants of the DATPs needed for the iterative improvement of compound properties during the downstream lead optimisation process.

#### Active diaminothienopyrimidines block *C. elegans* development

Although we are focused on developing an anthelmintic with improved efficacy over existing drugs against *Trichuris*, activity across the nematode phylum is valuable, particularly as efficacy against economically significant agricultural animal parasites would make further development more economically viable.

We therefore wanted to test the activity of the DATP chemotype against the clade V nematode *Caenorhabditis elegans*. Using a quantitative development assay to measure the growth of synchronised L1 stage worms, we tested varying concentrations of the compounds to determine the concentration-response effects. As shown in Fig 4, all four DATP compounds were active in this assay with EC<sub>50</sub> values from 7 – 87 µM.

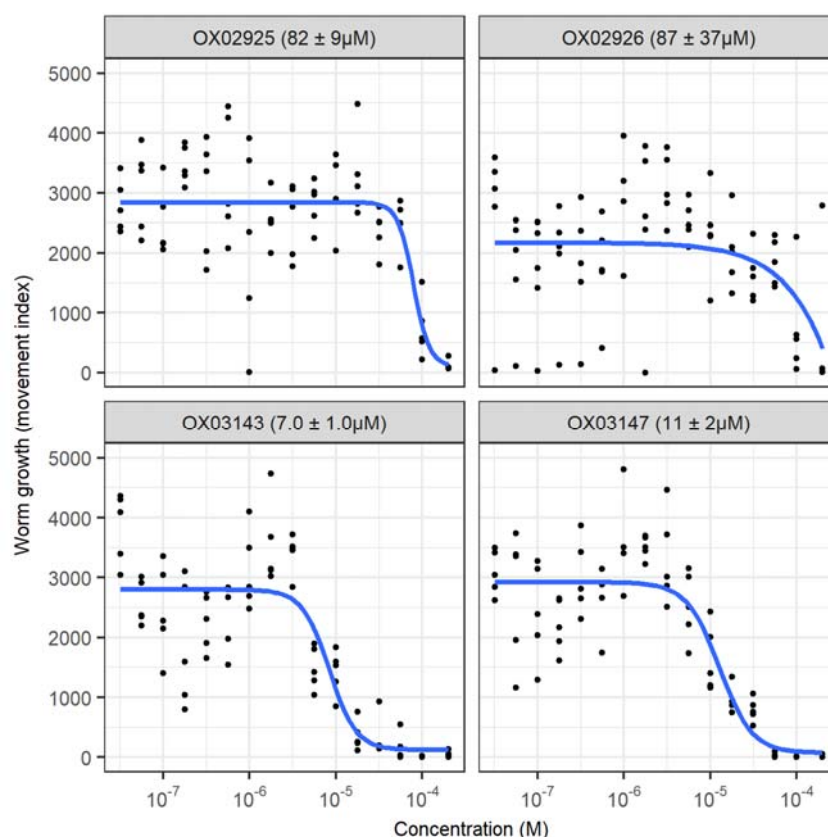

**Fig 4. Concentration-response curves for resynthesized DATPs in the *C. elegans* growth assay.**

n=5 wells per concentration per compound, each replicate on a different 96-well plate. Blue line indicates concentration-response curve fitted with the 4-factor log-logistic model using *drc* [16]. Figure in parenthesis indicates EC<sub>50</sub> estimate ± standard error from this model. No confidence limit could be calculated for **OX03143**.

Interestingly, the DATPs display differing trends in activity between the *Trichuris* and *C. elegans* assays. At this stage we do not know whether this reflects different potency at the target or different patterns of drug access between the species, but the findings highlight the importance of screening against *Trichuris* in the search for novel anthelmintic agents targeting whipworm. The data from each of these assays as well as structural descriptors and Lipinski rule assessment for the four DATP compounds and other anthelmintics are summarised in Table 1.

408 **Table 1. Properties and activities of resynthesized diaminothienopyrimidines, and other anthelmintics**

| Compound           | PubChem CID | Structure                                                                           | EC <sub>50</sub> (μM)              |                                   | RMM  | cLogP | HBA | HBD | tPSA (Å <sup>2</sup> ) | ROTb    |
|--------------------|-------------|-------------------------------------------------------------------------------------|------------------------------------|-----------------------------------|------|-------|-----|-----|------------------------|---------|
|                    |             |                                                                                     | <i>T. muris</i><br>paralysis assay | <i>C. elegans</i><br>growth assay |      |       |     |     |                        |         |
|                    |             | ('Drug-like' guidelines)                                                            |                                    |                                   | <500 | <5    | <10 | <5  | ( <140 )               | ( ≤10 ) |
| <b>OX02925</b>     | 49790760    | 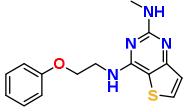   | 28 ± 18                            | 82 ± 9                            | 300  | 2.5   | 5   | 2   | 87                     | 6       |
| <b>OX02926</b>     | 49790669    |    | 26 ± 4                             | 82 ± 37                           | 379  | 3.0   | 6   | 2   | 97                     | 9       |
| <b>OX03143</b>     | 46948320    |    | 70                                 | 7 ± 1                             | 440  | 4.5   | 6   | 2   | 97                     | 9       |
| <b>OX03147</b>     | 49778268    |    | 44 ± 7                             | 11 ± 2                            | 344  | 3.1   | 5   | 2   | 87                     | 6       |
| <b>Levamisole</b>  | 26879       |    | 8 ± 3 <sup>a</sup>                 | 5 ± 1 <sup>a</sup>                | 204  | 1.7   | 2   | 0   | 41                     | 1       |
| <b>Albendazole</b> | 2082        |   | > 800 <sup>b</sup>                 | n.d.                              | 249  | 2.3   | 6   | 2   | 76                     | 5       |
| <b>Mebendazole</b> | 4030        |  | >600 <sup>b</sup>                  | 1.1 ± 0.2 <sup>a</sup>            | 295  | 2.7   | 6   | 2   | 84                     | 4       |
| <b>OX02983</b>     | 71447449    |  | 50 ± 13 <sup>c</sup>               | n.d.                              | 344  | 2.7   | 4   | 0   | 42                     | 3       |

409 RMM: relative molecule mass. HBA: number of hydrogen bond acceptors. HBD: number of hydrogen bond donors. tPSA: topological polar surface area,  
410 calculated using DataWarrior [23]. ROTB: number of rotatable bonds. <sup>a</sup> Data from [15]. <sup>b</sup> Data from [24]. <sup>c</sup> Data from [12].



# 411 Assessment of the cytotoxicity of the diaminothienopyrimidine series

412 It was critical to ensure that this series showed minimal cytotoxicity towards mammalian cells, and  
 413 showed selective activity against the parasite. For example, gut cytotoxicity may result in the  
 414 compounds having too narrow a therapeutic window. Selected examples of the DATPs were assessed  
 415 for cytotoxicity using the mouse gut epithelial cell line CMT-93 (Table 2). Although, the DATPs  
 416 exhibited increased *in vitro* cytotoxicity in these assays compared to the previously reported DHB  
 417 series [12], an encouraging overall profile was exhibited for these early stage molecules. Furthermore,  
 418 the nematode cuticle often limits drug access which reduces target engagement by small drug-like  
 419 molecules [25,26]. This means that compound optimisation to improve uptake through the cuticle may  
 420 be a fruitful route to improved anti-nematode selectivity, as well as improving the cytotoxicity profile.

421 It is interesting to note that the activity against *Trichuris* did not correlate with cytotoxicity, with the  
 422 most cytotoxic compound (**OX03143**) showing the lowest activity in the *T. muris* adult paralysis  
 423 assay, by a factor of over 10-fold. This suggests that either anti-*Trichuris* activity is distinct from  
 424 cytotoxic action, or that differential drug access can be exploited to achieve differential host-parasite  
 425 activity. Either possibility is encouraging and suggests that continued exploration and iterative  
 426 improvement of the DATP structure might be anticipated to deliver a more potent anthelmintic with  
 427 acceptable host toxicity.

| Compound       | WST-8<br>EC <sub>50</sub> (μM) | Neutral red<br>EC <sub>50</sub> (μM) | Adult <i>Trichuris</i> paralysis assay<br>EC <sub>50</sub> (μM) | 428 |
|----------------|--------------------------------|--------------------------------------|-----------------------------------------------------------------|-----|
|                |                                |                                      |                                                                 | 429 |
| <b>OX02925</b> | 75 (48-124)                    | 29 (19-43)                           | 28                                                              |     |
| <b>OX02926</b> | 43 (28-67)                     | 21 (15-31)                           | 26                                                              | 430 |
| <b>OX03143</b> | 15 (9-26)                      | 5 (3-7)                              | 70                                                              |     |
| <b>OX03147</b> | 37 (24-57)                     | 21 (14-30)                           | 44                                                              | 431 |

432 **Table 2. Summary of the cytotoxicity in a mouse epithelial cell line of the DATP series.** Mouse  
 433 CMT-93 rectal epithelial cells were used for this assay. Maximum tested concentration was 100 μM.

434  $n=8$ , error range (in parentheses) shows 95% confidence interval. EC<sub>50</sub> values in the adult *Trichuris*  
435 paralysis assay are shown for comparison.

#### 436 Activity of diaminothienopyrimidines against the infective egg stages of *T. muris*

437 Developing novel anthelmintics to disrupt the *T. trichiura* life cycle at the egg stage represents an  
438 exciting and complementary strategy to an oral therapy and is particularly attractive as *T. trichiura*  
439 eggs are highly resistant to extreme temperature changes and ultraviolet radiation, thereby remaining  
440 viable in the environment for many years [27]. We assessed whether the DATP derivatives were  
441 capable of affecting either infection establishment or embryonation of eggs. We first explored whether  
442 the compounds could alter the establishment of infection by soaking embryonated *T. muris* eggs in the  
443 test compounds for 14 days, washing the eggs and then determining infectivity both *in vitro* and *in*  
444 *vivo* (Fig 5A).

445 To determine effects on *in vitro* hatching, a protocol modified from that previously described [8] was  
446 established whereby eggs were induced to hatch when incubated in a culture of *Escherichia coli* at 37  
447 °C. The results are summarised in Fig 5B. Strikingly all DATPs were capable of significantly reducing  
448 *in vitro* hatching compared to the DMSO control.

#### 449 Diaminothienopyrimidines reduce the ability of *T. muris* eggs to infect mice

450 To extend this finding, we selected **OX02926** to test in an *in vivo* hatching and infection establishment  
451 assay, as this compound showed both a significant decrease in *in vitro* hatching and a small standard  
452 deviation between samples. The eggs were soaked as for the *in vitro* experiment and SCID mice were  
453 infected with 40 treated eggs (**OX02926** or DMSO) by oral gavage. Egg infectivity was quantified at  
454 day 15 post infection by culling the mice and counting the number of established worms in the gut.

455 This experiment was carried out in two batches and the raw data are shown in the S1 Figure. Because  
456 variation in control worm establishment is commonplace in *Trichuris* infections due to natural  
457 variation in egg infectivity from a standardised egg number, we took the approach of normalising data  
458 for each batch relative to the mean of the DMSO-only control group for that batch. This allowed us to

determine the effects of **OX02926** treatment (a full statistical description is given in the Methods section). The results are shown in Fig 5C. We used a two-way ANOVA (% batch normalised infection establishment ~ treatment \* batch) to analyse the data. There was a significant effect of treatment [F(1,24) = 9.569, P = 0.00497] but no effect of batch [F(1,24) = 0.083, P = 0.77618] or interaction [F(1,24) = 0.083 0.77618]. We therefore conducted a post-hoc Tukey HSD test which showed that infection establishment in the **OX02926**-treated group was significantly different from the DMSO-treated control group (P = 0.0050). **OX02926** was able to significantly reduce worm establishment *in vivo* by an estimated 40%.

467

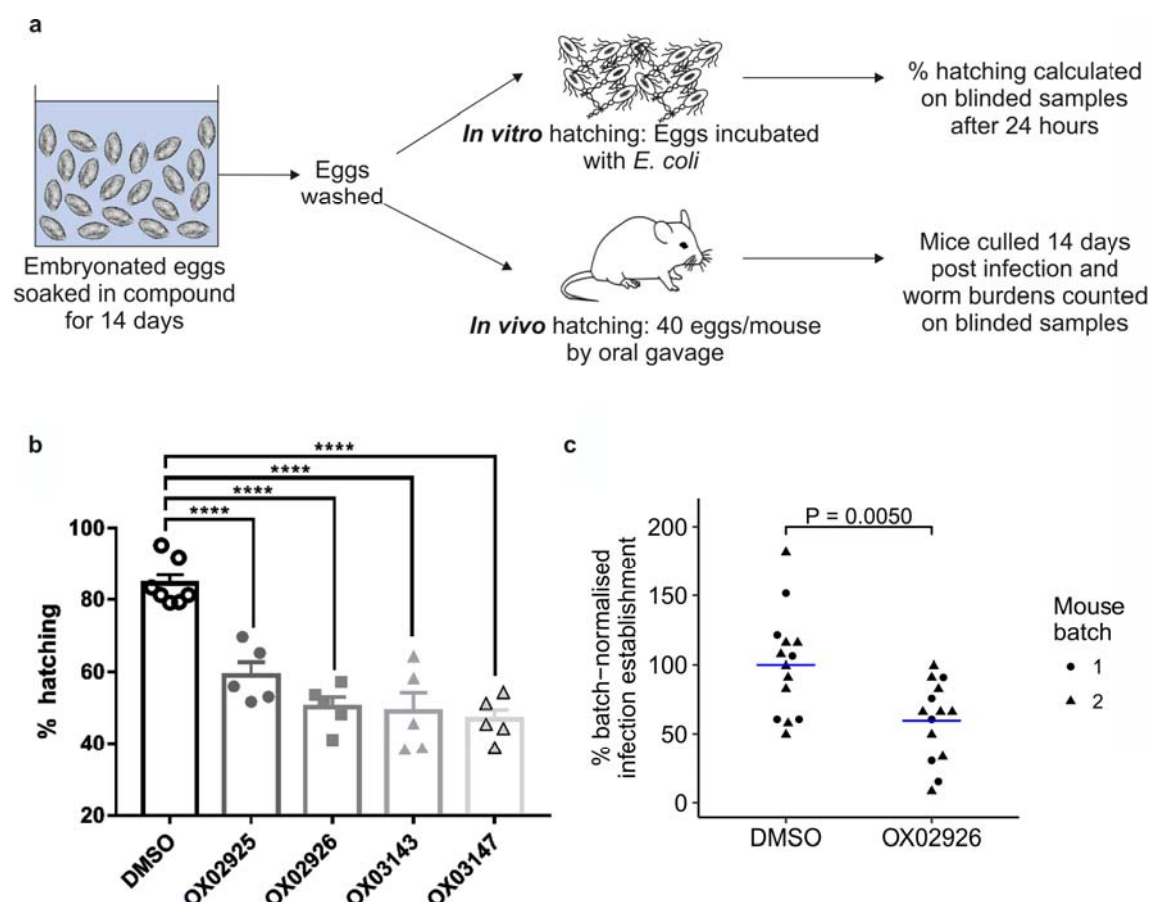

468

469 **Fig 5. *T. muris* eggs treated with diaminothienopyrimidines are less infective.** (a) Embryonated  
470 eggs were soaked in compound for 14 days, washed in water and then used in either *in vitro* or *in vivo*

hatching assays. **(b)** Treatment with DATPs reduced the ability of embryonated eggs to hatch in *E. coli* bacterial suspension after 24 hours. A one-way ANOVA showed a significant difference between treatment groups ( $F(5,26)=25.95$   $p<0.0001$ ) with a post-hoc Dunnett's compared to DMSO control (\*\*\*\*= $p<0.0001$ )  $n=7$  (DMSO),  $n=5$  (DATP compounds) **(c)** SCID mice were infected with 40 eggs and worm burden assessed at day 15 post infection. The experiment was carried out in two batches, with  $n=5$  and  $n=9$  mice respectively in each of the control and treatment groups. Data were normalised for each batch relative to the mean of the DMSO-only control group for that batch. Blue line indicates mean for each treatment group. A two-way ANOVA showed a significant effect of treatment [ $F(1,24) = 9.569$ ,  $P = 0.00497$ ] but no effect of batch [ $F(1,24) = 0.083$ ,  $P = 0.77618$ ] or interaction [ $F(1,24) = 0.083$   $0.77618$ ]. A post-hoc Tukey HSD test showed that the **OX02926**-treated group was significantly different from the DMSO control group ( $P = 0.0050$ ).

482

### 483 Activity of diaminothienopyrimidines against the embryonation of *T. muris* eggs

484 The ability of the DATPs to alter the embryonation of *T. muris* eggs was investigated by soaking  
485 unembryonated *T. muris* eggs collected overnight from live adult *T. muris* in the test compounds at 26  
486 °C for the duration of the embryonation process (56-60 days). During embryonation the first larval  
487 stage of the parasite develops within the egg shell (Fig 6A) from a ball of cells (Fig 6B). Treatment  
488 with the DATPs **OX02925** and **OX03147** resulted in a significant increase in the percentage of  
489 unembryonated eggs present compared to the DMSO control (Fig 6D). Importantly, although the other  
490 DATPs did not alter the percentage of eggs unable to undergo the embryonation process, the larvae  
491 that developed were atypical (Fig 6D-I). These atypical larvae were morphologically altered with the  
492 granules present within the larvae appearing less distinct.

493 As **OX03147** had the clearest phenotype with a significant increase in the number of unembryonated  
494 eggs, a concentration response study was performed to determine if an effect could be seen at lower  
495 treatment doses. Additionally, we repeated the experiment at room temperature to allow for more

496 physiological conditions rather than the constant 26 °C utilised in the initial study to standardise  
 497 conditions across experiments. Although the increased number of unembryonated eggs was only  
 498 detected at the highest drug dose tested (100 µM) at both 26 °C and room temperature (Fig 6C, J)  
 499 striking effects on egg morphology was detectable at concentrations as low as 1 µM with significant  
 500 larvae stunting observed (Fig 6K).

501 To the known range of applications of DATPs in medicinal chemistry we can now add anthelmintic  
 502 activity. This study suggests they have significant potential for further development into dual-acting  
 503 therapeutic agents for both the reduction of *Trichuris* egg infectivity, and embryonation in the  
 504 environment. Thus, their actions on both the embryonated and unembryonated egg stages may enable  
 505 a break in the parasite lifecycle.

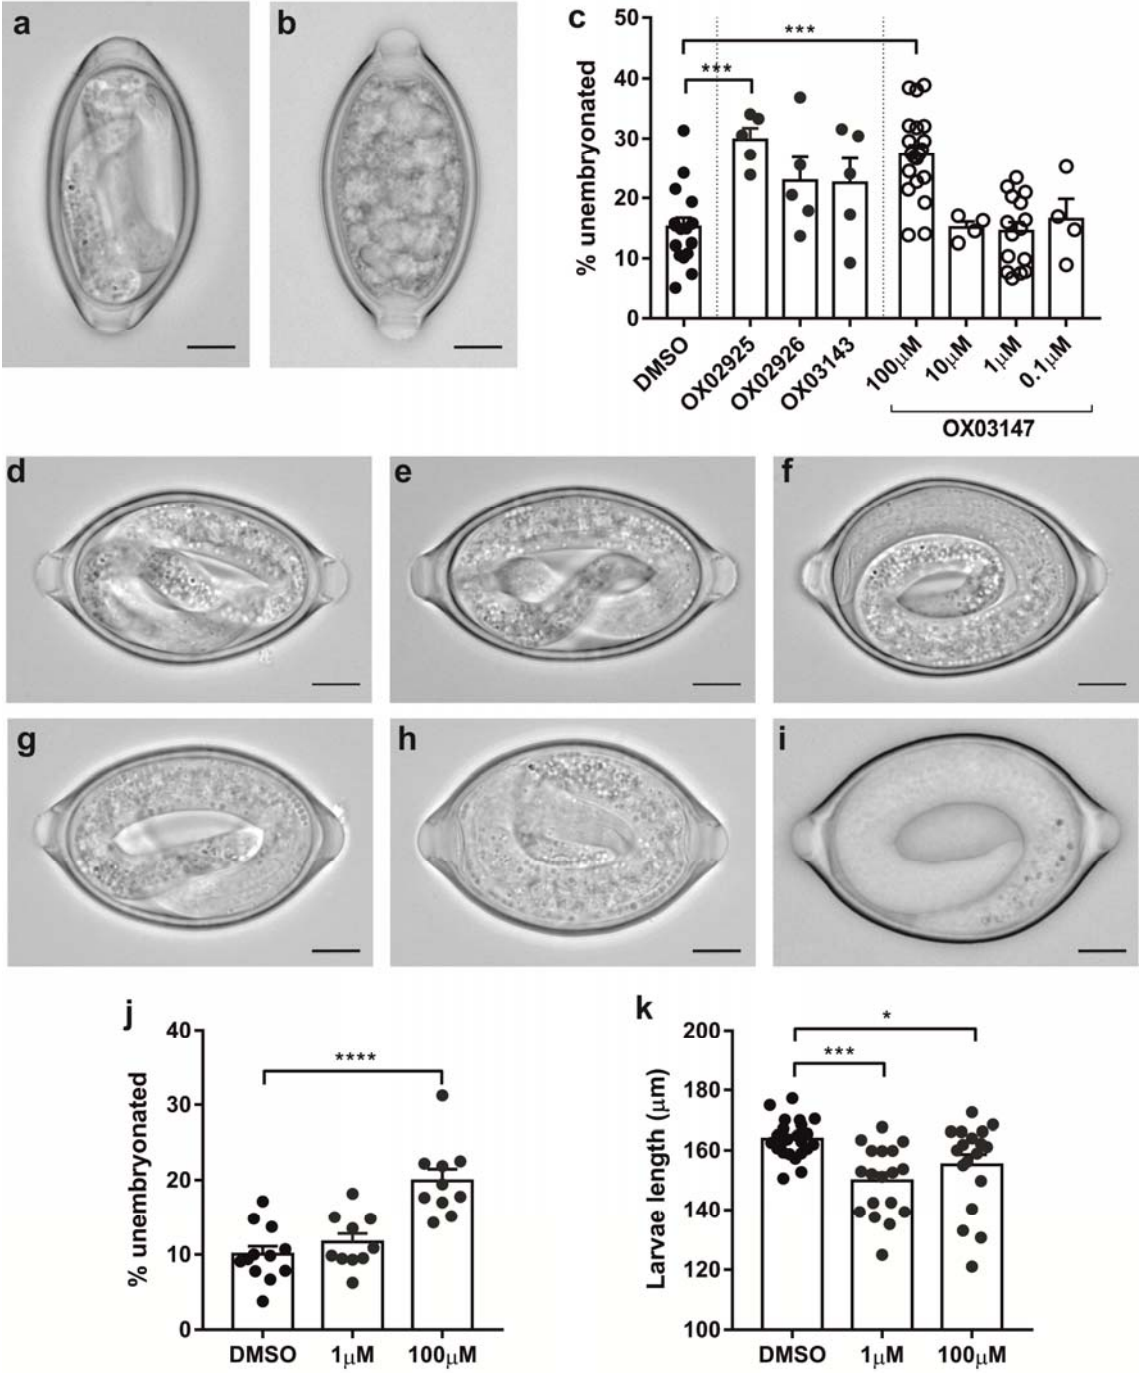

506

507 **Fig 6. Unembryonated *T. muris* eggs treated with diaminothienopyrimidines have altered**  
508 **embryonation.** Unembryonated eggs were soaked in 100 μM compound (unless specified otherwise)  
509 at 26 °C (unless specified otherwise) for the duration of the embryonation process (56-60 days) and  
510 then embryonation determined and eggs imaged using an Olympus BX63 microscope. Scale bar

511 indicates 10  $\mu$ m. (a) Typical embryonated egg and (b) unembryonated egg. (c) treatment with DATPs  
 512 increased the incidence of unembryonated eggs. Representative pictures of (d) DMSO, (e) **OX02925**,  
 513 (f) **OX02926**, (g) **OX03143** and (h) **OX03147** 100  $\mu$ M and (i) **OX03147** 1  $\mu$ M soaked *T. muris* eggs.  
 514 (j) Unembryonated eggs soaked in **OX03147** at room temperature for 56 days and embryonation  
 515 determined. (k) Unembryonated eggs soaked in **OX03147** at 26 °C for 56 days and larval length  
 516 calculated using ImageJ.

517

## 518 Discussion

519 Gastrointestinal nematode parasites remain a significant human health burden. Current anthelmintics  
520 lack efficacy and achieve low cure rates, threatening the targets set by the World Health Organisation  
521 for control of soil-transmitted helminths [2,28]. In particular, existing drugs have notably low efficacy  
522 against *T. trichiura*, the human whipworm. *T. trichiura* may be especially difficult to target as it  
523 inhabits the large intestine and is in part intracellular [29]. Thus, the metabolically active head end, the  
524 stichosome, is buried in the host epithelial cells lining the gut, affording some protection from orally  
525 delivered anthelmintics.

### 526 Diaminothienopyrimidines (DATPs), a new anthelmintic chemotype

527 We recently reported a small molecule screen for new anthelmintics targeting the gastro-intestinal (GI)  
528 nematode parasite *Trichuris muris* that identified the dihydrobenzoxazepinone (DHB) chemotype. The  
529 DHBs had not previously been ascribed anthelmintic activity [10]. Here, we describe a second class of  
530 novel anthelmintic, the diaminothienopyrimidines (DATPs). The potential for this early stage series is  
531 significant; the chemical synthesis of this series is facile and lends itself to iterative optimisation, will  
532 facilitate structural modifications aiming, for example, to increase local epithelial penetrance and  
533 hence improve efficacy during future development. Furthermore, this straightforward production  
534 imparts a favourable cost-economic aspect onto the series.

### 535 Activity against the egg stage of *T. muris*

536 In addition to activity against the adult stage of whipworm, the DATPs were also able to significantly  
537 reduce egg hatching, both *in vitro* and *in vivo*. These data are in keeping with members of the DHB  
538 series, which also were able to inhibit parasite egg hatching. However, unlike the DHB series, we  
539 identified members of the DATPs that also significantly reduced the percentage of eggs embryonating  
540 *ex vivo*, with other members of the DATP series appearing to disrupt the embryonation process,  
541 resulting in defects in embryonic elongation and abnormal egg shape. *Trichuris* egg embryonation  
542 occurs gradually and the mechanism by which it occurs is currently a poorly understood process. A  
543 detailed characterisation of the morphological changes which occur with the *Trichuris suis* egg during



embryonation has been described and other *Trichuris* species appear to undergo the same process. Once the unembryonated, unsegmented eggs are deposited the two clear, nuclei-like areas move together and fuse. Cellular division then begins, initially occurring asymmetrically with two blastomeres of unequal size. The larger blastomere then divides again and then subsequently each blastomere divides in two until a blastula forming of many small blastomeres develops. The initial larval differentiation then occurs with the appearance of a motile cylindrical embryo, which gradually turns into an infective larva with its characteristic oral spear. The fully developed larva is no longer motile and is thought to be a L1 larva as no moult is observed within the egg [30]. The embryonation process is temperature sensitive. The effect of temperature on egg embryonation has been characterised in detail in recent years for *T. suis* eggs with the embryonation process accelerated at 30-32 °C compared to 18 °C, with degeneration of the eggs rather than embryonation observed at higher temperatures (40 °C). At low temperatures (5-10 °C) no embryonation occurs, however once these eggs are then transferred to optimal embryonation temperatures normal embryonation proceeds [31]. Similar temperature sensitivity has been described for other *Trichuris* species including *Trichuris trichiura* with different species embryonating with different kinetics [32,33]. More research is required to understand the mechanisms behind this embryonation process, which may then allow an even more targeted approach to breaking the life cycle.

Humans become infected with *Trichuris* via a faecal oral route. Adult parasites in the intestine shed unembryonated eggs, which pass out with the faeces and embryonate in the external environment over a period of five weeks. Parasite eggs are only infective if fully embryonated upon ingestion. Thus, the ability of the DATPs to disrupt both embryonated egg hatching and the embryonation provides an exciting alternative strategy, environmental control, to decrease *Trichuris* infection rates in the field without the need to deliver anthelmintics to the infected host.

## Other diaminothienopyrimidines – their applications and targets

Thienopyrimidines have received much interest in medicinal chemistry as they are bioisosteres for purines, such as the nucleic acid components adenine and guanine. They are also related to

570 quinazolines, an important class of kinase inhibitors, including gefitinib and erlotinib, which act by  
 571 recognizing the ATP-binding site of the enzyme [34]. Thieno[2,3-*d*]pyrimidines are a particularly  
 572 important scaffold, with many reported examples of protein kinase inhibitors, as well as inhibitors of  
 573 dihydrofolate reductase, kainite receptor agonists, and  $\alpha_1$ -adrenoreceptor antagonists [35]. The  
 574 thieno[3,2-*d*]pyrimidine scaffold, found in the compounds reported in this study, has also been  
 575 investigated, leading to the identification of a series of phosphatidylinositol-3-kinase inhibitors [36]. A  
 576 series of 2,4-diaminothieno[3,2-*d*]pyrimidines (the same core scaffold as the compounds reported in  
 577 this study) have been described as orally active antimalarial agents [37], with activity in the low  
 578 nanomolar range against *Plasmodium falciparum*. This series was later improved by systematic  
 579 modification giving improved antimalarial activity, but unfortunately continued hERG inhibition [38].  
 580 A series of 2,4-diaminothieno[3,2-*d*]pyrimidines has also recently been reported as active against the  
 581 endosymbiotic bacterium *Wolbachia*, with potential use against filarial nematodes [39]. In neither of  
 582 these latter two cases is the molecular target of the compounds known.

## 583 Conclusions

584 In summary we report the discovery of a new class of anthelmintic, the DATPs, which possesses  
 585 activity directed against adult stage *T. muris* parasites and the egg stage. Importantly, as a chemical  
 586 series the DATPS are notable, since they are relatively facile to produce synthetically thereby  
 587 presenting considerable scope for structural modifications to improve efficacy and deliver an  
 588 optimised agent.

589     **Acknowledgements**

590     Special thanks goes to Roger Meadows for his help with the microscopy.

591

## 592 References

- 593 1. World Health Organization. Helminth control in school age children: a guide for managers of  
594 control programmes [Internet]. 2nd ed. 2011. Available:  
595 [http://www.who.int/intestinal\\_worms/resources/9789241548267/en/](http://www.who.int/intestinal_worms/resources/9789241548267/en/)
- 596 2. Keiser J, Utzinger J. Efficacy of current drugs against soil-transmitted helminth infections:  
597 Systematic review and meta-analysis. JAMA. 2008;299: 1937–1948.  
598 doi:10.1001/jama.299.16.1937
- 599 3. Turner HC, Truscott JE, Bettis AA, Hollingsworth TD, Brooker SJ, Anderson RM. Analysis of  
600 the population-level impact of co-administering ivermectin with albendazole or mebendazole for  
601 the control and elimination of *Trichuris trichiura*. Parasite Epidemiol Control. 2016;1: 177–187.  
602 doi:10.1016/j.parepi.2016.02.004
- 603 4. Scott I, Pomroy WE, Kenyon PR, Smith G, Adlington B, Moss A. Lack of efficacy of  
604 monepantel against *Teladorsagia circumcincta* and *Trichostrongylus colubriformis*. Vet  
605 Parasitol. 2013;198: 166–171. doi:10.1016/j.vetpar.2013.07.037
- 606 5. Diawara A, Drake LJ, Suswillo RR, Kihara J, Bundy DAP, Scott ME, et al. Assays to Detect  $\beta$ -  
607 Tubulin Codon 200 Polymorphism in *Trichuris trichiura* and *Ascaris lumbricoides*. PLoS Negl  
608 Trop Dis. 2009;3: e397. doi:10.1371/journal.pntd.0000397
- 609 6. Diawara A, Halpenny CM, Churcher TS, Mwandawiro C, Kihara J, Kaplan RM, et al.  
610 Association between Response to Albendazole Treatment and  $\beta$ -Tubulin Genotype Frequencies  
611 in Soil-transmitted Helminths. PLoS Negl Trop Dis. 2013;7: e2247.  
612 doi:10.1371/journal.pntd.0002247
- 613 7. Koyama K. Bacteria-induced hatching of *Trichuris muris* eggs occurs without direct contact  
614 between eggs and bacteria. Parasitol Res. 2016;115: 437–440. doi:10.1007/s00436-015-4795-2
- 615 8. Hayes KS, Bancroft AJ, Goldrick M, Portsmouth C, Roberts IS, Grencis RK. Exploitation of the  
616 intestinal microflora by the parasitic nematode *Trichuris muris*. Science. 2010;328: 1391–1394.  
617 doi:10.1126/science.1187703
- 618 9. Hurst RJ, Hopwood T, Gallagher AL, Partridge FA, Burgis T, Sattelle DB, et al. An antagonist  
619 of the retinoid X receptor reduces the viability of *Trichuris muris* in vitro. BMC Infect Dis.  
620 2014;14: 520. doi:10.1186/1471-2334-14-520
- 621 10. Silbereisen A, Tritten L, Keiser J. Exploration of novel in vitro assays to study drugs against  
622 *Trichuris* spp. J Microbiol Methods. 2011;87: 169–175. doi:10.1016/j.mimet.2011.08.009
- 623 11. Wangchuk P, Pearson MS, Giacomini PR, Becker L, Sotillo J, Pickering D, et al. Compounds  
624 Derived from the Bhutanese Daisy, *Ajania nubigena*, Demonstrate Dual Anthelmintic Activity  
625 against *Schistosoma mansoni* and *Trichuris muris*. PLOS Negl Trop Dis. 2016;10: e0004908.  
626 doi:10.1371/journal.pntd.0004908
- 627 12. Partridge FA, Murphy EA, Willis NJ, Bataille CJR, Forman R, Heyer-Chauhan N, et al.  
628 Dihydrobenz[e][1,4]oxazepin-2(3H)-ones, a new anthelmintic chemotype immobilising  
629 whipworm and reducing infectivity *in vivo*. PLoS Negl Trop Dis. 2017;11: e0005359.  
630 doi:10.1371/journal.pntd.0005359
- 631 13. Buckingham SD, Sattelle DB. Fast, automated measurement of nematode swimming (thrashing)  
632 without morphometry. BMC Neurosci. 2009;10: 84. doi:10.1186/1471-2202-10-84

- 633 14. Buckingham SD, Partridge FA, Sattelle DB. Automated, high-throughput, motility analysis in  
634 *Caenorhabditis elegans* and parasitic nematodes: Applications in the search for new  
635 anthelmintics. Int J Parasitol Drugs Drug Resist. 2014;4: 226–232.  
636 doi:10.1016/j.ijpddr.2014.10.004
- 637 15. Partridge FA, Brown AE, Buckingham SD, Willis NJ, Wynne GM, Forman R, et al. An  
638 automated high-throughput system for phenotypic screening of chemical libraries on *C. elegans*  
639 and parasitic nematodes. Int J Parasitol Drugs Drug Resist. 2018;8: 8–21.  
640 doi:10.1016/j.ijpddr.2017.11.004
- 641 16. Ritz C, Baty F, Streibig JC, Gerhard D. Dose-Response Analysis Using R. PLOS ONE. 2015;10:  
642 e0146021. doi:10.1371/journal.pone.0146021
- 643 17. Stiernagle T. Maintenance of *C. elegans*. WormBook. 2006; doi:10.1895/wormbook.1.101.1
- 644 18. Schindelin J, Arganda-Carreras I, Frise E, Kaynig V, Longair M, Pietzsch T, et al. Fiji: an open-  
645 source platform for biological-image analysis. Nat Methods. 2012;9: 676–682.  
646 doi:10.1038/nmeth.2019
- 647 19. Dahlin JL, Walters MA. The essential roles of chemistry in high-throughput screening triage.  
648 Future Med Chem. 2014;6: 1265–1290. doi:10.4155/fmc.14.60
- 649 20. Oprea TI, Allu TK, Fara DC, Rad RF, Ostopovici L, Bologa CG. Lead-like, Drug-like or “Pub-  
650 like”: How different are they? J Comput Aided Mol Des. 2007;21: 113–119.  
651 doi:10.1007/s10822-007-9105-3
- 652 21. Rankovic Z. CNS Physicochemical Property Space Shaped by a Diverse Set of Molecules with  
653 Experimentally Determined Exposure in the Mouse Brain. J Med Chem. 2017;60: 5943–5954.  
654 doi:10.1021/acs.jmedchem.6b01469
- 655 22. McKerrow JH, Lipinski CA. The rule of five should not impede anti-parasitic drug development.  
656 Int J Parasitol Drugs Drug Resist. 2017;7: 248–249. doi:10.1016/j.ijpddr.2017.05.003
- 657 23. Sander T, Freyss J, von Korff M, Rufener C. DataWarrior: An Open-Source Program For  
658 Chemistry Aware Data Visualization And Analysis. J Chem Inf Model. 2015;55: 460–473.  
659 doi:10.1021/ci500588j
- 660 24. Keiser J, Tritten L, Adelfio R, Vargas M. Effect of combinations of marketed human  
661 anthelmintic drugs against *Trichuris muris* *in vitro* and *in vivo*. Parasit Vectors. 2012;5: 292.  
662 doi:10.1186/1756-3305-5-292
- 663 25. Ho NFH, Geary TG, Barsuhn CL, Sims SM, Thompson DP. Mechanistic studies in the  
664 transcuticular delivery of antiparasitic drugs II: *ex vivo/in vitro* correlation of solute transport by  
665 *Ascaris suum*. Mol Biochem Parasitol. 1992;52: 1–13. doi:10.1016/0166-6851(92)90031-E
- 666 26. Burns AR, Wallace IM, Wildenhain J, Tyers M, Giaever G, Bader GD, et al. A predictive model  
667 for drug bioaccumulation and bioactivity in *Caenorhabditis elegans*. Nat Chem Biol. 2010;6:  
668 549–557. doi:10.1038/nchembio.380
- 669 27. Maya C, Ortiz M, Jiménez B. Viability of *Ascaris* and other helminth genera non larval eggs in  
670 different conditions of temperature, lime (pH) and humidity. Water Sci Technol J Int Assoc  
671 Water Pollut Res. 2010;62: 2616–2624. doi:10.2166/wst.2010.535

- 672 28. Moser W, Schindler C, Keiser J. Efficacy of recommended drugs against soil transmitted  
673 helminths: systematic review and network meta-analysis. *BMJ*. 2017;358: j4307.  
674 doi:10.1136/bmj.j4307
- 675 29. Tilney LG, Connelly PS, Guild GM, Vranich KA, Artis D. Adaptation of a nematode parasite to  
676 living within the mammalian epithelium. *J Exp Zool A Comp Exp Biol*. 2005;303A: 927–945.  
677 doi:10.1002/jez.a.214
- 678 30. Wakelin D. The Development of the Early Larval Stages of *Trichuris muris* in the Albino  
679 Laboratory Mouse. *J Helminthol*. 1969;43: 427–436. doi:10.1017/S0022149X00004995
- 680 31. Vejzagić N, Kringel H, Bruun JM, Roepstorff A, Thamsborg SM, Grossi AB, et al. Temperature  
681 dependent embryonic development of *Trichuris suis* eggs in a medicinal raw material. *Vet*  
682 *Parasitol*. 2016;215: 48–57. doi:10.1016/j.vetpar.2015.10.031
- 683 32. Nolf LO. Experimental studies on certain factors influencing the development and viability of  
684 the ova of the human *Trichuris* as compared with those of the human *Ascaris*. *Am J Epidemiol*.  
685 1932;16: 288–322. doi:10.1093/oxfordjournals.aje.a117862
- 686 33. Fahmy MA. An investigation on the life cycle of *Trichuris muris*. *Parasitology*. 1954;44: 50–57.
- 687 34. Zhang J, Yang PL, Gray NS. Targeting cancer with small molecule kinase inhibitors. *Nat Rev*  
688 *Cancer*. 2009;9: 28. doi:10.1038/nrc2559
- 689 35. Wilding B, Klempier N. Newest Developments in the Preparation of Thieno[2,3-*d*]pyrimidines.  
690 *Org Prep Proced Int*. 2017;49: 183–215. doi:10.1080/00304948.2017.1320513
- 691 36. Folkes AJ, Ahmadi K, Alderton WK, Alix S, Baker SJ, Box G, et al. The Identification of 2-(1H-  
692 Indazol-4-yl)-6-(4-methanesulfonyl-piperazin-1-ylmethyl)-4-morpholin-4-yl-thieno[3,2-  
693 d]pyrimidine (GDC-0941) as a Potent, Selective, Orally Bioavailable Inhibitor of Class I PI3  
694 Kinase for the Treatment of Cancer. *J Med Chem*. 2008;51: 5522–5532. doi:10.1021/jm800295d
- 695 37. González Cabrera D, Le Manach C, Douelle F, Younis Y, Feng T-S, Paquet T, et al. 2,4-  
696 Diaminopyrimidines as Orally Active Antimalarial Agents. *J Med Chem*. 2014;57: 1014–  
697 1022. doi:10.1021/jm401760c
- 698 38. González Cabrera D, Douelle F, Le Manach C, Han Z, Paquet T, Taylor D, et al. Structure–  
699 Activity Relationship Studies of Orally Active Antimalarial 2,4-Diamino-thienopyrimidines. *J*  
700 *Med Chem*. 2015;58: 7572–7579. doi:10.1021/acs.jmedchem.5b01156
- 701 39. Johnston KL, Cook DAN, Berry NG, Hong WD, Clare RH, Goddard M, et al. Identification and  
702 prioritization of novel anti-*Wolbachia* chemotypes from screening a 10,000-compound diversity  
703 library. *Sci Adv*. 2017;3: eaao1551. doi:10.1126/sciadv.aao1551

704

705

706 **Supporting information captions**

707 **S1 Figure. Raw data separated by batch for the *in vivo* hatching experiment.** Each point indicates  
708 one mouse that has been infected with *T. muris* eggs that had been treated with deionised water plus  
709 1% v/v DMSO (control) or deionised water plus 1% v/v DMSO and final concentration 100µM  
710 **OX02926** for 14 days. Blue line indicates mean for each treatment group.

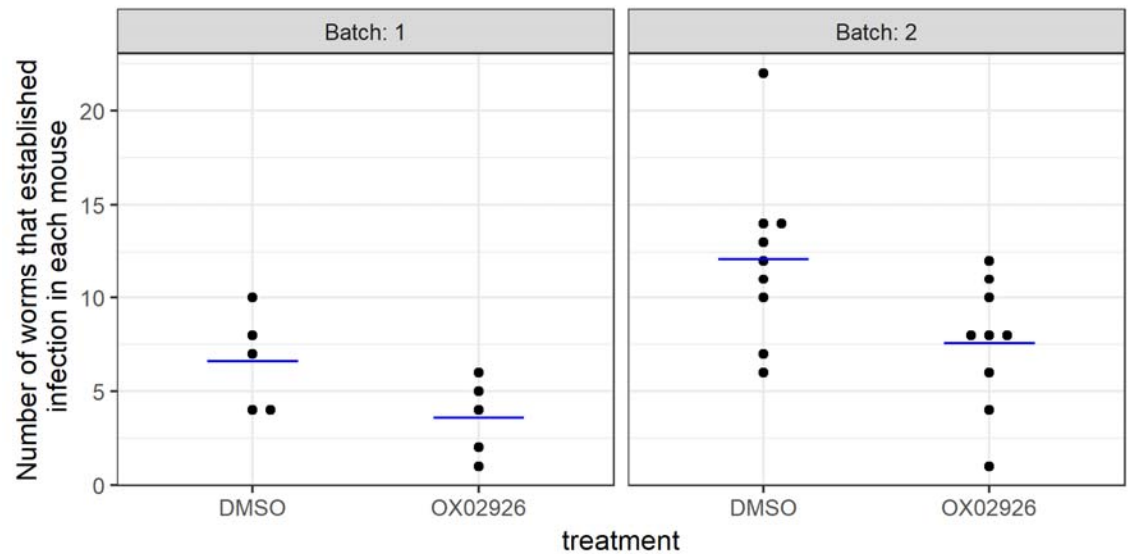

Source: https://www.biorxiv.org/content/10.1101/254037v2.full.pdf
